# Supplementary material
Source: PubMed Central journal article supplement (PMC5321672)
Supplement: NIHMS847418-supplement-1.pdf [file NIHMS847418-supplement-1.pdf]

**Supplementary Material for the article:**

**The Widening Gender Gap in Marijuana Use Prevalence in the U.S. during a Period of Economic Change, 2002-2014**

Hannah Carliner <sup>a</sup>, Pia M. Mauro <sup>a</sup>, Qiana L. Brown <sup>a</sup>, Dvora Shmulewitz <sup>b, c</sup>, Reanne Rahim <sup>b</sup>, Aaron L. Sarvet <sup>b</sup>, Melanie M. Wall <sup>b, c, d</sup>, Silvia S. Martins <sup>a</sup>, Geoffrey Carliner <sup>e</sup>, Deborah S. Hasin <sup>a, b, c, \*</sup>

**Affiliations**

<sup>a</sup> Department of Epidemiology, Mailman School of Public Health, Columbia University, New York, NY, USA

<sup>b</sup> New York State Psychiatric Institute, New York, NY, USA

<sup>c</sup> Department of Psychiatry, College of Physicians and Surgeons, Columbia University, New York, NY, USA

<sup>d</sup> Department of Biostatistics, Mailman School of Public Health, Columbia University, New York, NY, USA

<sup>e</sup> Department of Economics, Boston University, Boston, MA, USA

**\*Correspondence**

Deborah S. Hasin, Department of Psychiatry, Columbia University Medical Center,  
1051 Riverside Drive #123, New York, NY 10032

Phone: 1 (646) 774-7909, Fax: 1 (646)774-7920; Email: [deborah.hasin@gmail.com](mailto:deborah.hasin@gmail.com)

**This material supplements but does not replace the peer reviewed article in  
Drug and Alcohol Dependence**

**Table S1.** Sample characteristics overall and by gender, 2002-2014

|                       | <b>Overall</b><br><b>N= 492,831</b> |                                   | <b>Men</b><br><b>N=229,786</b><br><b>48.2% (SE=0.12)</b> |                                   | <b>Women</b><br><b>N=263,045</b><br><b>51.8% (SE=0.12)</b> |                                   |
|-----------------------|-------------------------------------|-----------------------------------|----------------------------------------------------------|-----------------------------------|------------------------------------------------------------|-----------------------------------|
|                       | N                                   | Prevalence <sup>a</sup><br>% (SE) | N                                                        | Prevalence <sup>a</sup><br>% (SE) | N                                                          | Prevalence <sup>a</sup><br>% (SE) |
| <b>Race/ethnicity</b> |                                     |                                   |                                                          |                                   |                                                            |                                   |
| <i>White</i>          | 318,422                             | 68.4 (0.16)                       | 149,950                                                  | 68.6 (0.20)                       | 168,472                                                    | 68.2 (0.19)                       |
| <i>Black</i>          | 59,914                              | 11.5 (0.12)                       | 25,719                                                   | 10.6 (0.13)                       | 34,195                                                     | 12.2 (0.15)                       |
| <i>Hispanic</i>       | 74,133                              | 13.6 (0.11)                       | 35,015                                                   | 14.4 (0.16)                       | 39,118                                                     | 12.9 (0.13)                       |
| <i>Other</i>          | 40,362                              | 6.5 (0.08)                        | 19,102                                                   | 6.4 (0.11)                        | 21,260                                                     | 6.7 (0.10)                        |
| <b>Age</b>            |                                     |                                   |                                                          |                                   |                                                            |                                   |
| <i>18-25</i>          | 235,045                             | 14.8 (0.08)                       | 111,835                                                  | 15.4 (0.10)                       | 123,210                                                    | 14.2 (0.09)                       |
| <i>26-34</i>          | 75,614                              | 16.0 (0.08)                       | 34,959                                                   | 16.4 (0.11)                       | 40,655                                                     | 15.5 (0.11)                       |
| <i>35-49</i>          | 106,154                             | 28.2 (0.12)                       | 48,706                                                   | 28.7 (0.14)                       | 57,448                                                     | 27.8 (0.16)                       |
| <i>50-64</i>          | 46,600                              | 24.2 (0.14)                       | 21,345                                                   | 24.2 (0.21)                       | 25,255                                                     | 24.1 (0.18)                       |
| <i>65+</i>            | 29,418                              | 16.9 (0.12)                       | 12,941                                                   | 15.3 (0.16)                       | 16,477                                                     | 18.5 (0.16)                       |
| <b>Marital</b>        |                                     |                                   |                                                          |                                   |                                                            |                                   |
| <i>Married</i>        | 184,573                             | 54.4 (0.15)                       | 82,824                                                   | 56.6 (0.17)                       | 101,749                                                    | 52.4 (0.18)                       |

|                           |         |             |         |             |         |             |
|---------------------------|---------|-------------|---------|-------------|---------|-------------|
| <i>Previously married</i> | 58,627  | 19.7 (0.11) | 20,584  | 14.5 (0.13) | 38,043  | 24.5 (0.15) |
| <i>Never married</i>      | 249,631 | 25.9 (0.11) | 126,378 | 28.9 (0.13) | 123,253 | 23.1 (0.13) |
| <hr/>                     |         |             |         |             |         |             |
| <b>Income</b>             |         |             |         |             |         |             |
| <i>\$0-19,999</i>         | 125,846 | 18.8 (0.12) | 52,684  | 16.1 (0.14) | 73,162  | 21.2 (0.17) |
| <i>\$20,000-49,999</i>    | 174,722 | 33.9 (0.13) | 81,279  | 33.3 (0.16) | 93,443  | 34.5 (0.18) |
| <i>\$50,000-74,999</i>    | 79,400  | 17.6 (0.11) | 38,187  | 18.0 (0.16) | 41,213  | 17.2 (0.14) |
| <i>\$75,000+</i>          | 112,863 | 29.8 (0.18) | 57,636  | 32.6 (0.22) | 55,227  | 27.1 (0.20) |
| <hr/>                     |         |             |         |             |         |             |
| <b>Education</b>          |         |             |         |             |         |             |
| <i>&lt;high school</i>    | 83,170  | 15.5 (0.10) | 43,153  | 16.4 (0.13) | 40,017  | 14.7 (0.12) |
| <i>High school</i>        | 161,401 | 30.7 (0.14) | 77,801  | 30.6 (0.17) | 83,600  | 30.8 (0.17) |
| <i>&gt;high school</i>    | 248,260 | 53.8 (0.14) | 108,832 | 53.0 (0.20) | 139,428 | 54.5 (0.18) |

<sup>a</sup> adjusted for complex survey design

**Table S2.** Piecewise regression for past-year marijuana use, NSDUH 2002-2014, to identify potential change points (knots)<sup>b</sup>

| Knot        | Unadjusted                             |                                        |                | Adjusted for covariates <sup>a</sup>   |                                        |                            |
|-------------|----------------------------------------|----------------------------------------|----------------|----------------------------------------|----------------------------------------|----------------------------|
|             | $\beta_1$<br>(95% confidence interval) | $\beta_2$<br>(95% confidence interval) | R <sup>2</sup> | $\beta_1$<br>(95% confidence interval) | $\beta_2$<br>(95% confidence interval) | R <sup>2</sup>             |
| <b>2003</b> | -0.109 (-0.171, -0.046)                | 0.138 (0.075, 0.202)                   | 0.00097        | -0.129 (-0.191, -0.067)                | 0.167 (0.104, 0.230)                   | 0.10719                    |
| <b>2004</b> | -0.057 (-0.087, -0.028)                | 0.091 (0.059, 0.122)                   | 0.00103        | -0.067 (-0.095, -0.038)                | 0.108 (0.078, 0.138)                   | 0.10725                    |
| <b>2005</b> | -0.035 (-0.055, -0.016)                | 0.073 (0.051, 0.095)                   | 0.00109        | -0.040 (-0.058, -0.022)                | 0.086 (0.066, 0.107)                   | 0.10731                    |
| <b>2006</b> | -0.022 (-0.036, -0.008)                | 0.064 (0.047, 0.082)                   | 0.00113        | -0.024 (-0.038, -0.011)                | 0.077 (0.060, 0.094)                   | 0.10736                    |
| <b>2007</b> | <b>-0.012 (-0.023, -0.001)</b>         | <b>0.059 (0.044, 0.074)</b>            | <b>0.00115</b> | <b>-0.012 (-0.023, -0.001)</b>         | <b>0.070 (0.055, 0.086)</b>            | <b>0.10739<sup>c</sup></b> |
| <b>2008</b> | -0.003 (-0.012, 0.006)                 | 0.054 (0.040, 0.068)                   | 0.00113        | -0.002 (-0.011, 0.007)                 | 0.066 (0.051, 0.081)                   | 0.10737                    |
| <b>2009</b> | 0.006 (-0.002, 0.013)                  | 0.048 (0.034, 0.063)                   | 0.00107        | 0.008 (-0.000, 0.015)                  | 0.061 (0.046, 0.076)                   | 0.10732                    |
| <b>2010</b> | 0.011 (0.004, 0.017)                   | 0.050 (0.033, 0.066)                   | 0.00105        | 0.013 (0.006, 0.020)                   | 0.064 (0.048, 0.083)                   | 0.10730                    |
| <b>2011</b> | 0.014 (0.008, 0.020)                   | 0.059 (0.039, 0.079)                   | 0.00104        | 0.018 (0.012, 0.024)                   | 0.075 (0.053, 0.098)                   | 0.10729                    |
| <b>2012</b> | 0.018 (0.013, 0.023)                   | 0.071 (0.049, 0.098)                   | 0.00100        | 0.023 (0.018, 0.028)                   | 0.092 (0.062, 0.122)                   | 0.10723                    |
| <b>2013</b> | 0.021 (0.017, 0.026)                   | 0.110 (0.067, 0.153)                   | 0.00096        | 0.027 (0.022, 0.032)                   | 0.143 (0.092, 0.193)                   | 0.10718                    |

<sup>a</sup> Covariates include gender, age, race/ethnicity, marital status, education, and income.

<sup>b</sup> For each potential knot year (2003-2013), piecewise regression modeled marijuana use as a function of two continuous time variables. One time variable indicated interview year, while the second time variable was assigned a value of 0 from 2002 through the knot year, and indicated interview year from the knot year until 2014. This model allows for two different slopes, one until the knot year, and a second until 2014.

<sup>c</sup> The best fitting change point was determined based on the model with the highest R-squared value.

**Table S3:** Differential trends in prevalence of past-year marijuana use by gender, by income, NSDUH 2007-2014 (N=307,935)<sup>a</sup>

| <i>Unadjusted for covariates</i> |              |                                                    |                                                                                   |                                                           |
|----------------------------------|--------------|----------------------------------------------------|-----------------------------------------------------------------------------------|-----------------------------------------------------------|
| Household income                 | Gender       | Change in prevalence <sup>b</sup><br>(SE), p-value | Difference in change in prevalence<br>men vs. women <sup>c</sup><br>(SE), p-value | Differences by income level <sup>d</sup><br>(SE), p-value |
| \$0-19,999                       | <i>Men</i>   | 7.29% (1.22), ≤0.0001                              | 4.21% (1.30), 0.0015                                                              | 3.67% (1.52), 0.017                                       |
|                                  | <i>Women</i> | 3.08% (0.73), ≤0.0001                              | Reference                                                                         |                                                           |
| \$20,000-49,999                  | <i>Men</i>   | 4.56% (0.75), ≤0.0001                              | 2.33% (0.91), 0.011                                                               | 1.79% (1.22), 0.15                                        |
|                                  | <i>Women</i> | 2.22% (0.44), ≤0.0001                              | Reference                                                                         |                                                           |
| \$50,000-74,999                  | <i>Men</i>   | 2.89% (0.87), 0.001                                | 0.46% (1.18), 0.70                                                                | -0.09% (1.34), 0.95                                       |
|                                  | <i>Women</i> | 2.43% (0.63), 0.0002                               | Reference                                                                         |                                                           |
| \$75,000+                        | <i>Men</i>   | 3.05% (0.59), ≤0.0001                              | 0.55% (0.77), 0.48                                                                | reference                                                 |
|                                  | <i>Women</i> | 2.51% (0.51), ≤0.0001                              | Reference                                                                         |                                                           |

<sup>a</sup> Adjusted for complex survey design

<sup>b</sup> “Change in prevalence” refers to the difference in the estimated prevalences from 2007 to 2014. Estimated prevalences are from logistic regression with back-transformation to the prevalence (additive) scale. A positive difference indicates increase in use over time.

<sup>c</sup> “Difference in change in prevalence” for men versus women, also known as an interaction contrast. A difference that is significantly different from zero indicates additive interaction, i.e., different changes in men versus women.

<sup>d</sup> Three-way interaction, to determine if the differences in prevalence differences for men vs. women differ significantly by income group. A significant difference indicates that the relationship between men and women differs by income group.

**Table S4:** Differential trends in prevalence of past-year marijuana use by gender, by income, NSDUH 2007-2014 (N=307,935)<sup>a</sup>

| <i>Adjusted for covariates<sup>b</sup></i> |                                  |               |                                                          |                                                                                      |                                                                 |                    |
|--------------------------------------------|----------------------------------|---------------|----------------------------------------------------------|--------------------------------------------------------------------------------------|-----------------------------------------------------------------|--------------------|
|                                            | <b>Household income</b>          | <b>Gender</b> | <b>Change in prevalence<sup>c</sup></b><br>(SE), p-value | <b>Difference in change in prevalence men vs. women<sup>d</sup></b><br>(SE), p-value | <b>Differences by income level<sup>e</sup></b><br>(SE), p-value |                    |
| <i>Daily Marijuana Users</i>               | \$0-19,999                       | <i>Men</i>    | 2.27% (0.41), ≤.0001                                     | 1.18% (0.44), .008                                                                   | 1.02% (0.56), .067                                              |                    |
|                                            |                                  | <i>Women</i>  | 1.09% (0.23), ≤.0001                                     | reference                                                                            |                                                                 |                    |
|                                            | \$20,000-49,999                  | <i>Men</i>    | 1.61% (0.33), ≤.0001                                     | 0.64% (0.38), .09                                                                    | 0.48% (0.51), .35                                               |                    |
|                                            |                                  | <i>Women</i>  | 0.97% (0.18), ≤.0001                                     | reference                                                                            |                                                                 |                    |
|                                            | \$50,000-74,999                  | <i>Men</i>    | 1.54% (0.45), .0009                                      | 0.73% (0.57), .20                                                                    | 0.58% (0.68), .39                                               |                    |
|                                            |                                  | <i>Women</i>  | 0.80% (0.29), .006                                       | reference                                                                            |                                                                 |                    |
|                                            | \$75,000+                        | <i>Men</i>    | 0.83% (0.26), .002                                       | 0.16% (0.32), .63                                                                    | reference                                                       |                    |
|                                            |                                  | <i>Women</i>  | 0.67% (0.22), .002                                       | reference                                                                            |                                                                 |                    |
|                                            | <i>Non-daily Marijuana Users</i> | \$0-19,999    | <i>Men</i>                                               | 3.86% (0.76), ≤.0001                                                                 | 2.51% (0.88), .005                                              | 2.08% (1.21), .086 |
|                                            |                                  |               | <i>Women</i>                                             | 1.35% (0.59), .024                                                                   | reference                                                       |                    |
| \$20,000-49,999                            |                                  | <i>Men</i>    | 3.01% (0.57), ≤.0001                                     | 1.66% (0.73), .024                                                                   | 1.23% (1.13), .28                                               |                    |
|                                            |                                  | <i>Women</i>  | 1.35% (0.41), .001                                       | reference                                                                            |                                                                 |                    |
| \$50,000-74,999                            |                                  | <i>Men</i>    | 1.72% (0.68), .013                                       | -0.41% (1.00), .68                                                                   | -0.84% (1.29), .52                                              |                    |
|                                            |                                  | <i>Women</i>  | 2.13% (0.62), .0007                                      | reference                                                                            |                                                                 |                    |
| \$75,000+                                  |                                  | <i>Men</i>    | 3.01% (0.64), ≤.0001                                     | 0.43% (0.83), .60                                                                    | reference                                                       |                    |
|                                            |                                  | <i>Women</i>  | 2.58% (0.53), ≤.0001                                     | reference                                                                            |                                                                 |                    |

<sup>a</sup> Adjusted for complex survey design

<sup>b</sup> Covariates include age, race/ethnicity, and marital status

<sup>c</sup> “Change in prevalence” refers to the difference in the estimated prevalences from 2007 to 2014. Estimated prevalences are from logistic regression with back-transformation to the prevalence (additive) scale. A positive difference indicates increase in use over time.

<sup>d</sup> “Difference in change in prevalence” for men versus women, also known as an interaction contrast. A difference that is significantly different from zero indicates additive interaction, i.e., different changes in men versus women.

° Three-way interaction, to determine if the differences in prevalence differences for men vs. women differ significantly by income group. A significant difference indicates that the relationship between men and women differs by income group.
